# Supplementary material for: Genetic therapy in a mitochondrial disease model suggests a critical role for liver dysfunction in mortality
Source: eLife. 2022 Nov 21;11:e65488. doi: 10.7554/eLife.65488 (PMC9859037; doi:10.7554/eLife.65488)
Supplement: Figure 3—source data 1. [file elife-65488-fig3-data1.xlsx]

## Sheet: Figure 3 - Source Data 1
Figure 3 - Source Data 1
Source data analysing relative expression of lrpprc mRNA in 6 dpf lrpprc homozygous larvae
Cq; quantification cycle, d; delta, N/A; not applicable														Genotype	2^(-dCq)
															Biological Replicate
Biological Replicate	Experimental groups	lrpprc (test)				eef1a1l1 (ref)									1	2	3	4	5	Average
		Cq (Technical repicate 1)	Cq (Technical repicate 2)	Cq (Technical repicate 3)	Avarage Cq	Cq (Technical repicate 1)	Cq (Technical repicate 2)	Cq (Technical repicate 3)	Avarage Cq	dCq	2^(-dCq)			WT	0.00516254	0.005568	0.00499683	0.00273556	0.00329319	0.00435122
1	WT	27.64	27.68	27.76	27.6933	20.0693	20.1037	20.1139	20.0956	7.5977	0.00516254			lrpprc GBT0235/GBT0235	1.0343e-05	6.69095e-06	5.97296e-06	1.74619e-06	1.23853e-05	7.42769e-06
	lrpprc GBT0235/GBT0235	36.6	35.98	36.64	36.4067	19.8585	19.8593	19.8193	19.8457	16.561	1.0343e-05
2	WT	26.3503	26.2583	26.3836	26.3307	18.7487	18.7778	18.9998	18.8421	7.48863	0.005568
	lrpprc GBT0235/GBT0235	37.4521	35.361	NA	36.4065	19.2452	19.0989	19.3074	19.2172	17.1894	6.69095e-06
3	WT	29.0643	28.7105	29.1068	28.9605	21.3554	21.2509	21.3409	21.3158	7.64477	0.00499683
	lrpprc GBT0235/GBT0235	37.1995	38.5061	37.5207	37.7421	20.3765	20.4086	20.3818	20.389	17.3531	5.97296e-06			Genotype	Relative expression
															Biological Replicate
															1	2	3	4	5
4	WT	27.6736	27.5593	27.695	27.6426	19.1136	19.2544	19.0181	19.1287	8.51395	0.00273556			WT	1.18646	1.27964	1.14837	0.628688	0.756841
	lrpprc GBT0235/GBT0235	40	40	37.9756	39.3252	20.2818	20.1488	20.1629	20.1978	19.1274	1.74619e-06			lrpprc GBT0235/GBT0235	0.00237703	0.00153772	0.00137271	0.000401311	0.0028464
5	WT	30.2812	30.1884	30.1645	30.2114	22.0404	21.9164	21.9385	21.9651	8.2463	0.00329319
	lrpprc GBT0235/GBT0235	38.0201	38.564	39.465	38.6831	22.3857	22.3052	22.4553	22.3821	16.301	1.23853e-05
