# Supplementary material for: Genetic therapy in a mitochondrial disease model suggests a critical role for liver dysfunction in mortality
Source: eLife. 2022 Nov 21;11:e65488. doi: 10.7554/eLife.65488 (PMC9859037; doi:10.7554/eLife.65488)
Supplement: Figure 4—source data 1. — A.Data for the survival percentage of lrpprc+/+, lrpprcGBT0235/+ and lrpprcGBT0235/GBT0235. B. Numeric data for the relative expression of mitochondrial encoded transcripts in lrpprc+/+ and homozygous mutant larvae, lrpprcGBT0235/GBT0235. C. Data for lactate measurements in lrpprc+/+ and lrpprcGBT0235/GBT0235. [file elife-65488-fig4-data1.xlsx]

## Sheet: Figure 4a and Fig 7e
Figure 4a and Figure 7e
Survival percentge across different genotypes
Days (dpf)	lrpprc+/+						lrpprcGBT0235/+						lrpprcGBT0235/GBT0235						Tg(fabp10:Cre)/lrpprcGBT0235/GBT0235 & Tg(fabp10:Cre)/lrpprcGBT0235/+						Tg(fabp10:Cre)/lrpprc+/+
	Clutch 1	Clutch 2	Clutch 3	Clutch 4	Clutch 5		Clutch 1	Clutch 2	Clutch 3	Clutch 4	Clutch 5		Clutch 1	Clutch 2	Clutch 3	Clutch 4	Clutch 5		Clutch 1	Clutch 2	Clutch 3	Clutch 4	Clutch 5		Clutch 1	Clutch 2	Clutch 3	Clutch 4	Clutch 5
6	100 (20/20)	100 (15/15)	100 (19/19)	100 (12/12)	100 (10/10)		100 (25/25)	100 (15/15)	100 (31/31)	100 (12/12)	100 (17/17)		100 (14/14)	100 (15/15)	100 (17/17)	100 (6/6)	100 (9/9)		100 (40/40)	100 (30/30)	100 (46/46)	100 (21/21)	100 (30/30)		100 (20/20)	100 (15/15)	100 (11/11)	100 (6/6)	100 (9/9)
7	100 (20/20)	100 (15/15)	95 (18/19)	100 (12/12)	100 (10/10)		100 (25/25)	100 (15/15)	100 (31/31)	100 (12/12)	100 (17/17)		100 (14/14)	100 (15/15)	100 (17/17)	83 (5/6)	100 (9/9)		100 (40/40)	97 (29/30)	100 (46/46)	100 (21/21)	100 (30/30)		100 (20/20)	100 (15/15)	100 (11/11)	100 (6/6)	100 (9/9)
8	100 (20/20)	100 (15/15)	95 (18/19)	100 (12/12)	100 (10/10)		100 (25/25)	100 (15/15)	97 (30/31)	100 (12/12)	100 (17/17)		100 (14/14)	67 (10/15)	76 (13/17)	83 (5/6)	89 (8/9)		100 (40/40)	97 (29/30)	98 (45/46)	95 (20/21)	97 (29/30)		100 (20/20)	100 (15/15)	100 (11/11)	100 (6/6)	100 (9/9)
9	100 (20/20)	100 (15/15)	95 (18/19)	100 (12/12)	100 (10/10)		100 (25/25)	100 (15/15)	97 (30/31)	100 (12/12)	100 (17/17)		100 (14/14)	27 (4/15)	76 (13/17)	17 (1/6)	56 (5/9)		100 (40/40)	93 (28/30	98 (45/46)	95 (20/21)	97 (29/30)		100 (20/20)	100 (15/15)	100 (11/11)	100 (6/6)	100 (9/9)
10	100 (20/20)	100 (15/15)	95 (18/19)	100 (12/12)	100 (10/10)		92 (23/25)	100 (15/15)	97 (30/31)	100 (12/12)	100 (17/17)		0 (0/14)	20 (3/15)	47 (8/17)	17 (1/6)	44 (4/9)		97 (39/40)	90 (27/30)	98 (45/46)	95 (20/21)	93 (28/30		100 (20/20)	100 (15/15)	100 (11/11)	100 (6/6)	100 (9/9)
11	100 (20/20)	100 (15/15)	95 (18/19)	92 (11/12)	100 (10/10)		92 (23/25)	100 (15/15)	90 (28/31)	100 (12/12)	100 (17/17)		0 (0/14)	0 (0/15)	0 (0/17)	0 (0/6)	0 (0/9)		95 (38/40)	70 (21/30)	89 (41/46)	95 (20/21)	90 (27/30)		100 (20/20)	100 (15/15)	100 (11/11)	83 (5/6)	100 (9/9)
12	100 (20/20)	100 (15/15)	95 (18/19)	92 (11/12)	100 (10/10)		92 (23/25)	100 (15/15)	90 (28/31)	100 (12/12)	100 (17/17)		0 (0/14)	0 (0/15)	0 (0/17)	0 (0/6)	0 (0/9)		95 (38/40)	70 (21/30	89 (41/46)	95 (20/21)	70 (21/30)		95 (19/20)	100 (15/15)	100 (11/11)	83 (5/6)	100 (9/9)
Value representated as survived embryos (survival percentage)

## Sheet: Figure 4b- mt-nd4
Figure 4 - Source Data 1
Source data analysing relative expression of mt-nd4 mRNA in 6 dpf lrpprc homozygous larvae
Cq; quantification cycle, d; delta, N/A; not applicable														Genotype	2^(-dCq)
															Biological Replicate
Biological Replicate	Genotype	mt-nd4 (test)				eef1a1l1 (ref)									1	2	3	4	5	Average
		Cq (Technical repicate 1)	Cq (Technical repicate 2)	Cq (Technical repicate 3)	Average Cq	Cq (Technical repicate 1)	Cq (Technical repicate 2)	Cq (Technical repicate 3)	Average Cq	dCq	2^(-dCq)			lrpprc+/+	0.754607	0.769133	1.29202	0.667627	0.803873	0.857453
1	lrpprc+/+	20.4121	20.5545	20.5389	20.5018	20.0693	20.1037	20.1139	20.0956	0.406202	0.754607			lrpprc GBT0235/GBT0235	0.537323	0.316249	0.685447	0.356558	0.515803	0.482276
	lrpprc GBT0235/GBT0235	20.6001	20.7994	20.826	20.7418	19.8585	19.8593	19.8193	19.8457	0.896139	0.537323
2	lrpprc+/+	19.1224	19.215	19.3251	19.2208	18.7487	18.7778	18.9998	18.8421	0.378694	0.769133
	lrpprc GBT0235/GBT0235	20.8016	20.9015	20.9309	20.878	19.2452	19.0989	19.3074	19.2172	1.66087	0.316249
3	lrpprc+/+	20.8709	21.041	20.9265	20.9461	21.3554	21.2509	21.3409	21.3158	-0.369633	1.29202
	lrpprc GBT0235/GBT0235	20.8866	20.9812	NA	20.9339	20.3765	20.4086	20.3818	20.389	0.544883	0.685447
														Genotype	Relative expression
4	lrpprc+/+	19.8255	19.7096	19.5997	19.7116	19.1136	19.2544	19.0181	19.1287	0.582885	0.667627				Biological Replicate
	lrpprc GBT0235/GBT0235	21.6006	21.6921	21.7642	21.6856	20.2818	20.1488	20.1629	20.1978	1.48779	0.356558				1	2	3	4	5
														lrpprc+/+	0.880056	0.896998	1.50682	0.778617	0.937513
5	lrpprc+/+	22.2454	22.3063	22.2884	22.28	22.0404	21.9164	21.9385	21.9651	0.31496	0.803873			lrpprc GBT0235/GBT0235	0.62665	0.368824	0.799399	0.415833	0.601553
	lrpprc GBT0235/GBT0235	23.3328	23.3462	23.3325	23.3372	22.3857	22.3052	22.4553	22.3821	0.955107	0.515803

## Sheet: Figure 4b- mt-cyb
Figure 4 - Source Data 1
Source data analysing relative expression of mt-cyb mRNA in 6 dpf lrpprc homozygous larvae
Cq; quantification cycle, d; delta, N/A; not applicable														Genotype	2^(-dCq)
															Biological Replicate
Biological Replicate	Genotype	mt-cyb (test)				eef1a1l1 (ref)									1	2	3	4	5	Average
		Cq (Technical repicate 1)	Cq (Technical repicate 2)	Cq (Technical repicate 3)	Average Cq	Cq (Technical repicate 1)	Cq (Technical repicate 2)	Cq (Technical repicate 3)	Average Cq	dCq	2^(-dCq)			lrpprc+/+	0.980479	0.821282	0.852999	0.721156	1.0515	0.885484
1	lrpprc+/+	20.1537	20.1783	20.0402	20.1241	20.0693	20.1037	20.1139	20.0956	0.0284413	0.980479			lrpprc GBT0235/GBT0235	0.109247	0.0721463	0.0888836	0.0652215	0.0995377	0.0870072
	lrpprc GBT0235/GBT0235	23.2664	23.0118	22.8419	23.04	19.8585	19.8593	19.8193	19.8457	3.19434	0.109247
2	lrpprc+/+	19.3043	19.1108	18.9634	19.1262	18.7487	18.7778	18.9998	18.8421	0.28405	0.821282
	lrpprc GBT0235/GBT0235	23.0494	23.0595	22.9214	23.0101	19.2452	19.0989	19.3074	19.2172	3.79293	0.0721463
3	lrpprc+/+	21.7314	21.5434	21.3606	21.5451	21.3554	21.2509	21.3409	21.3158	0.229385	0.852999
	lrpprc GBT0235/GBT0235	23.7928	24.0367	23.8133	23.8809	20.3765	20.4086	20.3818	20.389	3.49194	0.0888836
														Genotype	Relative expression
7	lrpprc+/+	19.638	19.6178	19.5451	19.6003	19.1136	19.2544	19.0181	19.1287	0.471616	0.721156				Biological Replicate
	lrpprc GBT0235/GBT0235	24.1525	24.1852	24.0714	24.1364	20.2818	20.1488	20.1629	20.1978	3.93851	0.0652215				1	2	3	4	5
														lrpprc+/+	1.10728	0.927496	0.963314	0.814421	1.18749
8	lrpprc+/+	21.9227	21.8037	21.9514	21.8926	22.0404	21.9164	21.9385	21.9651	-0.0724517	1.0515			lrpprc GBT0235/GBT0235	0.123375	0.0814767	0.100379	0.0736564	0.11241
	lrpprc GBT0235/GBT0235	25.8129	25.6459	25.6732	25.7107	22.3857	22.3052	22.4553	22.3821	3.32861	0.0995377

## Sheet: Figure 4b- mt-co1
Figure 4 - Source Data 1
Source data analysing relative expression of mt-co1 mRNA in 6 dpf lrpprc homozygous larvae
Cq; quantification cycle, d; delta, N/A; not applicable														Genotype	2^(-dCq)
															Biological Replicate
Biological Replicate	Genotype	mt-co1 (test)				eef1a1l1 (ref)									1	2	3	4	Average
		Cq (Technical repicate 1)	Cq (Technical repicate 2)	Cq (Technical repicate 3)	Average Cq	Cq (Technical repicate 1)	Cq (Technical repicate 2)	Cq (Technical repicate 3)	Average Cq	dCq	2^(-dCq)			lrpprc+/+	1.46883	1.26216	1.22997	2.23787	1.54971
1	lrpprc+/+	19.6189	19.5416	19.4624	19.541	20.0693	20.1037	20.1139	20.0956	-0.554663	1.46883			lrpprc GBT0235/GBT0235	1.06788	0.582029	0.54523	0.897782	0.77323
	lrpprc GBT0235/GBT0235	19.8521	19.7368	19.6639	19.7509	19.8585	19.8593	19.8193	19.8457	-0.094749	1.06788
2	lrpprc+/+	18.5945	18.5517	18.3725	18.5062	18.7487	18.7778	18.9998	18.8421	-0.33589	1.26216			Genotype	2^(-dCq)
	lrpprc GBT0235/GBT0235	20.0462	19.8956	20.0523	19.998	19.2452	19.0989	19.3074	19.2172	0.780837	0.582029				Biological Replicate
															1	2	3	4
3	lrpprc+/+	18.8953	18.946	18.6489	18.8301	19.1136	19.2544	19.0181	19.1287	-0.298626	1.22997			lrpprc+/+	0.947809	0.814448	0.793681	1.44406
	lrpprc GBT0235/GBT0235	21.0869	21.0903	21.0415	21.0729	20.2818	20.1488	20.1629	20.1978	0.875064	0.54523			lrpprc GBT0235/GBT0235	0.689085	0.375574	0.351828	0.579324
4	lrpprc+/+	21.0057	20.8381	20.5651	20.8029	22.0404	21.9164	21.9385	21.9651	-1.16213	2.23787
	lrpprc GBT0235/GBT0235	22.5866	22.5193	22.507	22.5376	22.3857	22.3052	22.4553	22.3821	0.155562	0.897782

## Sheet: Figure 4b- mt-atp6
Figure 4 - Source Data 1
Source data analysing relative expression of mt-atp6 mRNA in 6 dpf lrpprc homozygous larvae
Cq; quantification cycle, d; delta, N/A; not applicable														Genotype	2^(-dCq)
															Biological Replicate
Biological Replicate	Genotype	mt-atp6 (test)				eef1a1l1 (ref)									1	2	3	4	5	Average
		Cq (Technical repicate 1)	Cq (Technical repicate 2)	Cq (Technical repicate 3)	Average Cq	Cq (Technical repicate 1)	Cq (Technical repicate 2)	Cq (Technical repicate 3)	Average Cq	dCq	2^(-dCq)			lrpprc+/+	1.61738	1.62686	1.90518	1.47556	2.22685	1.77037
1	lrpprc+/+	19.405	19.4448	19.3561	19.402	20.0693	20.1037	20.1139	20.0956	-0.693661	1.61738			lrpprc GBT0235/GBT0235	0.790036	0.75015	0.845363	0.817648	1.07941	0.856522
	lrpprc GBT0235/GBT0235	20.2471	20.1946	20.1154	20.1857	19.8585	19.8593	19.8193	19.8457	0.34001	0.790036
2	lrpprc+/+	18.1799	18.1549	18.0853	18.14	18.7487	18.7778	18.9998	18.8421	-0.702086	1.62686
	lrpprc GBT0235/GBT0235	19.6216	19.7502	19.5239	19.6319	19.2452	19.0989	19.3074	19.2172	0.414748	0.75015			Genotype	Relative Expression
															Biological Replicate
3	lrpprc+/+	20.4264	20.3806	20.3505	20.3858	21.3554	21.2509	21.3409	21.3158	-0.929928	1.90518				1	2	3	4	5
	lrpprc GBT0235/GBT0235	20.6576	20.673	20.5634	20.6313	20.3765	20.4086	20.3818	20.389	0.242357	0.845363			lrpprc+/+	0.913587	0.918938	1.07615	0.833477	1.25785
														lrpprc GBT0235/GBT0235	0.446256	0.423726	0.477508	0.461853	0.609712
4	lrpprc+/+	18.5217	18.6404	18.5401	18.5674	19.1136	19.2544	19.0181	19.1287	-0.561262	1.47556
	lrpprc GBT0235/GBT0235	20.5884	20.4281	20.4484	20.4883	20.2818	20.1488	20.1629	20.1978	0.290448	0.817648
5	lrpprc+/+	20.8088	20.8667	20.7547	20.8101	22.0404	21.9164	21.9385	21.9651	-1.155	2.22685
	lrpprc GBT0235/GBT0235	22.3779	22.2088	22.2287	22.2718	22.3857	22.3052	22.4553	22.3821	-0.110248	1.07941

## Sheet: Figure 4b- mt-atp8
Figure 4 - Source Data 1
Source data analysing relative expression of mt-atp8 mRNA in 6 dpf lrpprc homozygous larvae
Cq; quantification cycle, d; delta, N/A; not applicable														Genotype	2^(-dCq)
															Biological Replicate
Biological Replicate	Genotype	mt-atp8 (test)				eef1a1l1 (ref)									1	2	3	4	5	Average
		Cq (Technical repicate 1)	Cq (Technical repicate 2)	Cq (Technical repicate 3)	Average Cq	Cq (Technical repicate 1)	Cq (Technical repicate 2)	Cq (Technical repicate 3)	Average Cq	dCq	2^(-dCq)			lrpprc+/+	1.31136	1.54586	1.77333	1.63049	2.52039	1.75629
1	lrpprc+/+	19.708	19.7533	19.6524	19.7046	20.0693	20.1037	20.1139	20.0956	-0.391063	1.31136			lrpprc GBT0235/GBT0235	0.781181	0.69759	0.823693	0.82675	1.19074	0.863992
	lrpprc GBT0235/GBT0235	20.2047	20.2267	20.1744	20.202	19.8585	19.8593	19.8193	19.8457	0.35627	0.781181
2	lrpprc+/+	18.3403	18.1705	18.1303	18.2137	18.7487	18.7778	18.9998	18.8421	-0.628412	1.54586
	lrpprc GBT0235/GBT0235	19.7465	19.819	19.6446	19.7367	19.2452	19.0989	19.3074	19.2172	0.519548	0.69759
3	lrpprc+/+	20.5801	20.4869	20.4009	20.4893	21.3554	21.2509	21.3409	21.3158	-0.82646	1.77333			Genotype	2^(-dCq)
	lrpprc GBT0235/GBT0235	20.637	20.743	20.6264	20.6688	20.3765	20.4086	20.3818	20.389	0.279822	0.823693				Biological Replicate
															1	2	3	4	5
7	lrpprc+/+	18.4052	18.3844	18.4806	18.4234	19.1136	19.2544	19.0181	19.1287	-0.705305	1.63049			lrpprc+/+	0.746666	0.880189	1.0097	0.928374	1.43507
	lrpprc GBT0235/GBT0235	20.4114	20.5048	20.5008	20.4723	20.2818	20.1488	20.1629	20.1978	0.274476	0.82675			lrpprc GBT0235/GBT0235	0.444792	0.397196	0.468997	0.470738	0.67799
8	lrpprc+/+	20.5894	20.5756	20.7293	20.6314	22.0404	21.9164	21.9385	21.9651	-1.33365	2.52039
	lrpprc GBT0235/GBT0235	22.1129	22.0598	22.2178	22.1302	22.3857	22.3052	22.4553	22.3821	-0.251864	1.19074

## Sheet: Figure 4c
Figure 4C: Lactate analysis
Number of embryos	Lactate (µmol/ml)		Lactate (µmol/ml) (normalized per larvae)
	lrpprc+/+	lrpprcGBT0235/GBT0235	lrpprc+/+	lrpprcGBT0235/GBT0235
25	48.0009	188.968	1.92004	7.55872
25	33.0145	105.947	1.32058	4.23787
15	20.8287	100.601	1.38858	6.70675

## Sheet: Figure 4- figure supplement 1
Figure 4- figure supplement 1 - Source Data 1
Source data analysing mtDNA copy number in 6 dpf lrpprc homozygous larvae
Cq; quantification cycle, d; delta, N/A; not applicable
Larvae	Genotype	mt-nd1 (test)				polg (ref)				delta Cq (test-ref)	2^(-dCq)
		Cq (Technical repicate 1)	Cq (Technical repicate 2)	Cq (Technical repicate 3)	Average Cq	Cq (Technical repicate 1)	Cq (Technical repicate 2)	Cq (Technical repicate 3)	Average Cq
1	lrpprc+/+	NA	17.6187	17.6314	17.6251	22.8554	23.0174	22.8793	22.9174	-5.29231	39.1872
2	lrpprc+/+	19.05	19.0296	18.9977	19.0258	24.0137	23.7822	23.7927	23.8628	-4.83706	28.5824
3	lrpprc+/+	19.547	19.3804	19.5419	19.4898	24.2403	24.2743	24.1133	24.2093	-4.71951	26.346
4	lrpprc+/+	18.4011	18.2034	18.0634	18.2226	24.2931	24.3747	24.2492	24.3057	-6.08304	67.7917
5	lrpprc+/+	18.7849	18.9256	18.7862	18.8323	24.0061	23.9292	24.0214	23.9856	-5.15332	35.5881
6	lrpprc+/+	17.6941	17.5606	17.6202	17.625	23.805	23.8684	23.7443	23.8059	-6.18094	72.5516
7	lrpprc+/+	18.0898	17.9544	17.7182	17.9208	23.2195	23.2265	23.2497	23.2319	-5.31112	39.7014
8	lrpprc+/+	19.1093	19.073	18.8443	19.0089	23.7354	23.7184	23.6218	23.6919	-4.683	25.6877
9	lrpprc+/+	19.2268	19.1133	19.1852	19.1751	24.3083	24.2395	24.292	24.2799	-5.10481	34.4113
10	lrpprc+/+	20.0525	20.4815	20.503	20.3456	25.6357	26.5562	25.7131	25.9683	-5.62269	49.2718
11	lrpprc+/+	17.7189	17.8742	17.7632	17.7854	23.2462	23.1708	23.0619	23.1597	-5.37424	41.4771
12	lrpprc+/+	18.5163	18.26	18.2562	18.3442	24.0103	23.5758	23.6919	23.7593	-5.41514	42.6696
13	lrpprc+/+	18.4075	18.0491	17.8804	18.1123	23.5857	23.4315	23.4729	23.4967	-5.38434	41.7683
14	lrpprc+/+	18.2714	18.2601	18.2237	18.2517	23.1975	23.1062	23.631	23.3115	-5.05981	33.3545
1	lrpprc GBT0235/GBT0235	NA	20.8923	20.3929	20.6426	24.2274	24.0446	24.0789	24.117	-3.4744	11.1148
2	lrpprc GBT0235/GBT0235	18.9672	18.7872	18.6681	18.8075	23.7371	23.7077	23.6971	23.714	-4.90646	29.991
3	lrpprc GBT0235/GBT0235	18.6948	18.6067	18.4983	18.5999	23.7478	23.1854	23.7992	23.5775	-4.97758	31.5065
4	lrpprc GBT0235/GBT0235	19.1342	19.0218	19.0108	19.0556	24.1228	23.9505	23.6999	23.9244	-4.86882	29.2187
5	lrpprc GBT0235/GBT0235	19.4725	19.2714	19.1041	19.2827	24.3287	24.153	24.2481	24.2433	-4.96061	31.1381
6	lrpprc GBT0235/GBT0235	17.5358	17.5768	17.5484	17.5537	22.6985	22.5926	22.3869	22.5593	-5.00564	32.1254
7	lrpprc GBT0235/GBT0235	18.3858	18.2455	18.1006	18.244	23.8859	23.9531	23.763	23.8673	-5.62334	49.2938
8	lrpprc GBT0235/GBT0235	18.7619	18.6348	18.5031	18.6333	24.0172	23.9915	24.051	24.0199	-5.38664	41.8351
9	lrpprc GBT0235/GBT0235	18.185	18.1129	18.0931	18.1303	24.2852	24.289	24.2696	24.2813	-6.15093	71.0582
10	lrpprc GBT0235/GBT0235	18.1301	18.1197	18.0281	18.0926	24.2154	24.2757	24.1822	24.2244	-6.13179	70.1217
