# Supplementary material for: Genetic therapy in a mitochondrial disease model suggests a critical role for liver dysfunction in mortality
Source: eLife. 2022 Nov 21;11:e65488. doi: 10.7554/eLife.65488 (PMC9859037; doi:10.7554/eLife.65488)
Supplement: Figure 5—source data 1. [file elife-65488-fig5-data1.xlsx]

## Sheet: Fig 5b source data
lrpprc+/+			lrpprcGBT0235/GBT0235
Area	Mean gray value	Integrated density	Area	Mean gray value	Integrated density
368080	60.443	22247743	368512	55.411	20419654
423310	62.303	26373375	311483	44.764	13943332
433807	61.3	26592300	405492	50.782	20591743
389967	67.954	26499895	447549	58.723	26281545
498624	66.709	33262692	458184	41.05	18808320
402084	68.912	27708540	431217	49.982	21553141
483339	57.687	27882168	419200	49.397	20707309
393571	52.174	20534298	425709	43.542	18536234
432470	51.191	22138603	408695	47.521	19421790
492590	53.125	26169033	425483	49.929	21244092
411200	55.229	22710313	370313	42.347	15681812
445704	53.907	24026459	363328	44.477	16159728
378668	50.333	19059395	403345	50.693	20446887
392754	53.465	20998612	412779	48.948	20204833
			425224	42.991	18280995

## Sheet: Fig 5- supplement 1 -4 dpf
lrpprc+/+			lrpprcGBT0235/GBT0235			Tg(fabp10:Cre)lrpprcGBT0235/GBT0235
Area	Mean gray value	Integrated density	Area	Mean gray value	Integrated density	Area	Mean gray value	Integrated density
481301	64.987	31278409	401834	41.354	16617379	471082	42.238	19897718
461391	65.957	30432017	376370	43.578	16401612	460446	42.639	19632854
427994	66.262	28359826	489571	39.842	19505505	500931	79.118	39632547
411053	69.11	28408039	407279	38.934	15856803	521206	78.625	40979666
404063	56.137	22682934	351486	68.127	23945817	488686	58.48	28578551
409647	62.96	25791349	498168	77.432	38574229	432145	74.775	32313585
395339	76.186	30119364	363108	69.602	25273002	552221	56.424	31158696
443205	73.446	32551831	434506	67.733	29430273	535352	58.256	31187515
398476	58.781	23422897	503519	65.268	32863800	441050	58.046	25601143
447064	57.825	25851535	537557	62.591	33646015	433902	54.891	23817170
431745	66.119	28546528	393630	55.477	21837250	400648	43.746	17526846
452622	84.39	38196638	466321	52.819	24630573	417751	41.27	17240533
444106	120.59	53554704	429933	48.493	20848906	487559	57.604	28085266
483044	127.774	61720406
417622	101.406	42349373
444153	115.064	51105859
413290	102.85	42506734
512735	86.94	44577007
562669	95.173	53551057
506307	92.238	46700615
517314	83.411	43149484
461157	102.665	47344653
463739	53.837	24966505
470689	61.543	28967631
553019	89.092	49269544
535922	89.895	48176880
498559	94.765	47245903
503352	76.51	38511568

## Sheet: Fig 5- fig supplement 2
Acrdine orange particle counts
lrpprc+/+	lrpprcGBT0235/GBT0235
127	285
197	74
332	541
34	487
184	324
237	221
