# Supplementary material for: Genetic therapy in a mitochondrial disease model suggests a critical role for liver dysfunction in mortality
Source: eLife. 2022 Nov 21;11:e65488. doi: 10.7554/eLife.65488 (PMC9859037; doi:10.7554/eLife.65488)
Supplement: Figure 7—source data 1. [file elife-65488-fig7-data1.xlsx]

## Sheet: Fig 7D source data
Relative area of the liver stained with Oil Red O staining in representative images of different embryos
lrpprc+/+ & Tg(fabp10:Cre)lrpprc+/+	lrpprcGBT0235/GBT0235	Tg(fabp10:Cre)lrpprcGBT0235/GBT0235
0.043449	0.455374	0.125834
0.419788	2.09926	1.73911
0.040508	2.39863	0.674834
2.51998	1.76678	1.27381
1.94483	2.03959	0.231517
0.284547	0.322376	0.074813
0.653663	2.08228	0.160984
2.12055	2.21985	0.044585
1.00667	2.22736	0.171118
2.20415	2.45999	0.020822
0.95644	2.04844
0.612427	2.18779
1.58864	2.55382
0.285013
0.319347

## Sheet: Figure 7E source data
Figure 4a and Figure 7e
Survival percentge across different genotypes
Days (dpf)	lrpprc+/+						lrpprcGBT0235/+						lrpprcGBT0235/GBT0235						Tg(fabp10:Cre)/lrpprcGBT0235/GBT0235 & Tg(fabp10:Cre)/lrpprcGBT0235/+						Tg(fabp10:Cre)/lrpprc+/+
	Clutch 1	Clutch 2	Clutch 3	Clutch 4	Clutch 5		Clutch 1	Clutch 2	Clutch 3	Clutch 4	Clutch 5		Clutch 1	Clutch 2	Clutch 3	Clutch 4	Clutch 5		Clutch 1	Clutch 2	Clutch 3	Clutch 4	Clutch 5		Clutch 1	Clutch 2	Clutch 3	Clutch 4	Clutch 5
6	100 (20/20)	100 (15/15)	100 (19/19)	100 (12/12)	100 (10/10)		100 (25/25)	100 (15/15)	100 (31/31)	100 (12/12)	100 (17/17)		100 (14/14)	100 (15/15)	100 (17/17)	100 (6/6)	100 (9/9)		100 (40/40)	100 (30/30)	100 (46/46)	100 (21/21)	100 (30/30)		100 (20/20)	100 (15/15)	100 (11/11)	100 (6/6)	100 (9/9)
7	100 (20/20)	100 (15/15)	95 (18/19)	100 (12/12)	100 (10/10)		100 (25/25)	100 (15/15)	100 (31/31)	100 (12/12)	100 (17/17)		100 (14/14)	100 (15/15)	100 (17/17)	83 (5/6)	100 (9/9)		100 (40/40)	97 (29/30)	100 (46/46)	100 (21/21)	100 (30/30)		100 (20/20)	100 (15/15)	100 (11/11)	100 (6/6)	100 (9/9)
8	100 (20/20)	100 (15/15)	95 (18/19)	100 (12/12)	100 (10/10)		100 (25/25)	100 (15/15)	97 (30/31)	100 (12/12)	100 (17/17)		100 (14/14)	67 (10/15)	76 (13/17)	83 (5/6)	89 (8/9)		100 (40/40)	97 (29/30)	98 (45/46)	95 (20/21)	97 (29/30)		100 (20/20)	100 (15/15)	100 (11/11)	100 (6/6)	100 (9/9)
9	100 (20/20)	100 (15/15)	95 (18/19)	100 (12/12)	100 (10/10)		100 (25/25)	100 (15/15)	97 (30/31)	100 (12/12)	100 (17/17)		100 (14/14)	27 (4/15)	76 (13/17)	17 (1/6)	56 (5/9)		100 (40/40)	93 (28/30	98 (45/46)	95 (20/21)	97 (29/30)		100 (20/20)	100 (15/15)	100 (11/11)	100 (6/6)	100 (9/9)
10	100 (20/20)	100 (15/15)	95 (18/19)	100 (12/12)	100 (10/10)		92 (23/25)	100 (15/15)	97 (30/31)	100 (12/12)	100 (17/17)		0 (0/14)	20 (3/15)	47 (8/17)	17 (1/6)	44 (4/9)		97 (39/40)	90 (27/30)	98 (45/46)	95 (20/21)	93 (28/30		100 (20/20)	100 (15/15)	100 (11/11)	100 (6/6)	100 (9/9)
11	100 (20/20)	100 (15/15)	95 (18/19)	92 (11/12)	100 (10/10)		92 (23/25)	100 (15/15)	90 (28/31)	100 (12/12)	100 (17/17)		0 (0/14)	0 (0/15)	0 (0/17)	0 (0/6)	0 (0/9)		95 (38/40)	70 (21/30)	89 (41/46)	95 (20/21)	90 (27/30)		100 (20/20)	100 (15/15)	100 (11/11)	83 (5/6)	100 (9/9)
12	100 (20/20)	100 (15/15)	95 (18/19)	92 (11/12)	100 (10/10)		92 (23/25)	100 (15/15)	90 (28/31)	100 (12/12)	100 (17/17)		0 (0/14)	0 (0/15)	0 (0/17)	0 (0/6)	0 (0/9)		95 (38/40)	70 (21/30	89 (41/46)	95 (20/21)	70 (21/30)		95 (19/20)	100 (15/15)	100 (11/11)	83 (5/6)	100 (9/9)
Value representated as survived embryos (survival percentage)
