# Supplementary material for: Genetic therapy in a mitochondrial disease model suggests a critical role for liver dysfunction in mortality
Source: eLife journal article supplement (doi:10.7554/elife.65488), 2022-11-21
Supplement: supp [file elife_poa_e65488_Figure_8_source_data_1.xlsx]

## Sheet: EXPT1
									peak normalized for TFC peak (peak area for l.e./TFC peak area for l.e.)
GT	peak (in order)	ret time min	rel area	area counts*min	injection volume	# larvae/tube	larval equivalent	peak area/l.e.
wt CRE+	TFC	23.867	31.8	80556.7	5	10	1	80556.7
	TG	60.42	17.04	43163.5	5		1	43163.5	0.535815
	CE	61.75	7.92	20052.2	5		1	20052.2	0.24892
	TG	64.033	31.9	80817.1	5		1	80817.1	1.00323
	TG	67.093	2.92	7391.36	5		1	7391.36	0.0917535
	TG	67.577	2.33	5897.87	5		1	5897.87	0.0732139
wt CRE-	TFC	23.863	32.95	144360	3	11	0.66	218727
	TG	60.393	21.23	93022.3	3		0.66	140943	0.644379
	CE	61.693	2.89	12641.8	3		0.66	19154.2	0.0875714
	TG	64.01	33.05	144827	3		0.66	219435	1.00324
	TG	67.077	2.81	12310.2	3		0.66	18651.9	0.0852748
	TG	67.597	1.58	6923.42	3		0.66	10490	0.0479595
het CRE+	TFC	23.93	23.21	51734.6	3	10	0.6	86224.3
	TG	60.483	20	44577.1	3		0.6	74295.1	0.861649
	CE	61.83	6.6	14704	3		0.6	24506.6	0.284219
	TG	64.103	36.9	82252.4	3		0.6	137087	1.58989
	TG	67.177	4.83	10759.7	3		0.6	17932.8	0.207978
	TG	67.67	2.92	6513.15	3		0.6	10855.3	0.125896
mut CRE+	TFC	23.97	13.26	12216.8	3	10	0.6	20361.3
	TG	60.553	20.65	19027.4	3		0.6	31712.3	1.55748
	CE	61.907	4.32	3983.58	3		0.6	6639.3	0.326074
	TG	64.187	41.74	38460.2	3		0.6	64100.4	3.14815
	TG	67.227	5.51	5072.02	3		0.6	8453.37	0.415168
	TG	67.77	3.66	3373.45	3		0.6	5622.42	0.276133
het CRE-	TFC	23.987	14.11	20505.7	3	8	0.48	42720.2
	TG	60.577	21.79	31671.2	3		0.48	65981.7	1.54451
	CE	61.933	12.89	18737.2	3		0.48	39035.9	0.913756
	TG	64.21	37.49	54478.1	3		0.48	113496	2.65673
	TG	67.263	5.35	7771.5	3		0.48	16190.6	0.378992
	TG	67.813	2.4	3480.7	3		0.48	7251.46	0.169743
					3 15
mut CRE-	TFC	23.957	100	5436.8	3	10	0.6	9061.34
	TG	61.113	21.85	98532.9	15		3	32844.3	3.62466
	CE	62.057	0.98	4424.01	15		3	1474.67	0.162743
	TG	64.323	46.36	209063	15		3	69687.8	7.69068
	TG	67.39	4.41	19895.8	15		3	6631.94	0.731894
	TG	67.903	4.01	18069.8	15		3	6023.26	0.664721

## Sheet: EXPT2
GT	peak (in order)	ret.time min	rel. area %	area counts*min	injection volume	# larvae/tube	larval equivalents	peak area/l.e.	peak normalized for TFC peak (peak area for l.e./TFC peak area for l.e. )
WT CRE-					3	8	0.48
	TFC	25.397	2.26	30996.5			0.48	64576
	TG	62.403	27.3	374884			0.48	781008	12.0944
	CE	64.093	7.63	104731			0.48	218190	3.37882
	TG	66.103	46.8	642674			0.48	1.3389e+06	20.7338
	TG	69.19	3.89	53385			0.48	111219	1.72229
	TG	69.74	3.24	44432.6			0.48	92567.9	1.43347
HET CRE-					5	8	0.8
	TFC	25.427	1.71	31401.7			0.8	39252.1
	TG	62.487	30.31	557138			0.8	696422	17.7423
	CE	64.197	5.85	107537			0.8	134421	3.42457
	TG	66.187	47.14	866404			0.8	1.083e+06	27.591
	TG	69.28	3.82	70273.8			0.8	87842.2	2.2379
	TG	69.827	2.94	53959.1			0.8	67448.9	1.71835
WT CRE-					3	8	0.48
	TFC	25.493	2.64	28162.3			0.48	58671.5
	TG	62.55	28.67	305593			0.48	636653	10.8511
	CE	64.27	6.18	65901.4			0.48	137295	2.34006
	TG	66.253	47.6	507338			0.48	1.05695e+06	18.0148
	TG	69.343	4.02	42832.6			0.48	89234.5	1.52092
	TG	69.897	3.24	34512.9			0.48	71901.8	1.2255
WT CRE-					3	8	0.48
	TFC	25.55	1.5	17955.4			0.48	37407
	TG	59.27	7.98	95623.2			0.48	199215	5.3256	58671.5
	TG	62.643	29.6	354743			0.48	739049	19.7569	58671.5
	CE	64.377	8.51	101981			0.48	212460	5.67967	58671.5
	TG	66.343	45.57	546080			0.48	1.13767e+06	30.4132	58671.5
	TG	69.443	3.81	45659.5			0.48	95124	2.54294	58671.5
	TG	69.983	3.03	36285.2			0.48	75594.2	2.02085	58671.5
HET CRE-					3	8	0.48
	TFC	25.603	1.81	21658.9			0.48	45122.7
	TG	59.377	7.96	95076.6			0.48	198076	4.38973	37407
	TG	62.75	30.22	360850			0.48	751771	16.6606	37407
	CE	64.503	8.65	103348			0.48	215308	4.7716	37407
	TG	66.453	45.26	540427			0.48	1.12589e+06	24.9517	37407
	TG	69.543	3.2	38248.5			0.48	79684.5	1.76595	37407
	TG	70.103	2.89	34555.8			0.48	71991.3	1.59546	37407
HET CRE-					3	9	0.54
	TFC	25.863	1.36	14909.1			0.54	27609.5
	TG	59.733	7.33	80592.1			0.54	149245	5.40555	45122.7
	TG	63.123	30.48	334937			0.54	620255	22.4653	45122.7
	CE	64.943	7.32	80421.4			0.54	148928	5.39411	45122.7
	TG	66.84	46.62	512306			0.54	948715	34.3619	45122.7
	TG	69.937	3.85	42346.6			0.54	78419.6	2.84031	45122.7
	TG	70.49	3.03	33345.7			0.54	61751.4	2.2366	45122.7
MUT CRE-					3	8	0.48
	TFC	25.897	1.18	9306.68			0.48	19388.9
	TG	59.96	12.26	96341.2			0.48	200711	10.3518	27609.5
	TG	63.173	22.72	178527			0.48	371930	19.1826	27609.5
	CE	64.993	4.27	33569.8			0.48	69937.1	3.60707	27609.5
	TG	66.887	50.85	399557			0.48	832410	42.9323	27609.5
	TG	69.987	3.18	24958			0.48	51995.9	2.68173	27609.5
	TG	70.54	5.54	43497			0.48	90618.7	4.67374	27609.5
MUT CRE-					3	8	0.48
	TFC	25.913	1.64	9008.67			0.48	18768.1
	TG	60	12.97	71246.4			0.48	148430	7.90866	19388.9
	TG	63.2	21.63	118837			0.48	247577	13.1914	19388.9
	CE	65.047	3.74	20576.3			0.48	42867.4	2.28406	19388.9
	TG	66.92	51.32	281961			0.48	587419	31.2989	19388.9
	TG	70.017	3.31	18200.6			0.48	37917.9	2.02034	19388.9
	TG	70.577	5.39	29636.4			0.48	61742.5	3.28976	19388.9
MUT CRE-					3	7	0.42
	TFC	25.967	1.02	8342.02			0.42	19861.9
	TG	60.06	12.95	105758			0.42	251804	12.6777	18768.1
	TG	63.29	22	179636			0.42	427706	21.5339	18768.1
	CE	65.133	4.44	36249.8			0.42	86309.1	4.34545	18768.1
	TG	67.007	51.11	417294			0.42	993557	50.0232	18768.1
	TG	70.107	3.69	30145.2			0.42	71774.3	3.61366	18768.1
	TG	70.67	4.78	39043.5			0.42	92960.7	4.68034	18768.1
WT CRE+					3	8	0.48
	TFC	26.033	2.23	21676			0.48	45158.4
	TG	59.98	8.43	81978.9			0.48	170789	3.78201	19861.9
	TG	63.36	30.61	297627			0.48	620056	13.7307	19861.9
	CE	65.217	6.91	67205			0.48	140010	3.10043	19861.9
	TG	67.08	45.2	439526			0.48	915679	20.2771	19861.9
	TG	70.183	3.71	36096.9			0.48	75201.9	1.66529	19861.9
	TG	70.74	2.91	28307.8			0.48	58974.6	1.30595	19861.9
WT CRE+					3	9	0.54
	TFC	25.63	3.24	40385.8			0.54	74788.6
	TG	59.92	7.67	95535.2			0.54	176917	2.36556	45158.4
	TG	63.32	28.94	360495			0.54	667584	8.92628	45158.4
	CE	65.157	7.92	98651.5			0.54	182688	2.44272	45158.4
	TG	67.047	45.35	564832			0.54	1.04598e+06	13.9859	45158.4
	TG	70.14	3.75	46752.8			0.54	86579.4	1.15765	45158.4
	TG	70.703	3.12	38885.3			0.54	72009.9	0.962846	45158.4
WT CRE+					3	8	0.48
	TFC	25.703	2.97	42166.2			0.48	87846.3
	TG	59.997	8.07	114460			0.48	238459	2.7145	74788.6
	TG	63.407	27.51	390006			0.48	812512	9.24924	74788.6
	CE	65.263	9.33	132251			0.48	275522	3.13641	74788.6
	TG	67.14	45.67	647569			0.48	1.3491e+06	15.3575	74788.6
	TG	70.243	3.59	50886.8			0.48	106014	1.20681	74788.6
	TG	70.803	2.86	40588.5			0.48	84559.3	0.962583	74788.6
HET CRE+					3	8	0.48
	TFC	25.713	2.29	20613.2			0.48	42944.3
	TG	60.017	7.63	68720.8			0.48	143168	3.33382	87846.3
	TG	63.433	27.26	245580			0.48	511626	11.9137	87846.3
	CE	65.29	10.6	95526.5			0.48	199013	4.63423	87846.3
	TG	67.163	46	414439			0.48	863415	20.1055	87846.3
	TG	70.28	3.5	31561.9			0.48	65753.9	1.53115	87846.3
	TG	70.83	2.71	24437.5			0.48	50911.4	1.18552	87846.3
HET CRE+					3	8	0.48
	TFC	25.707	1.71	25749.9			0.48	53645.6
	TG	60.033	8.48	127484			0.48	265592	4.95086	42944.3
	TG	63.44	30.15	453082			0.48	943922	17.5955	42944.3
	CE	65.3	5.65	84831.6			0.48	176732	3.29444	42944.3
	TG	67.177	46.93	705097			0.48	1.46895e+06	27.3825	42944.3
	TG	70.28	3.86	57983.7			0.48	120799	2.2518	42944.3
	TG	70.837	3.22	48358.2			0.48	100746	1.878	42944.3
HET CRE+					3	8	0.48
	TFC	25.757	2.04	30614.5			0.48	63780.2
	TG	60.1	7.47	112336			0.48	234033	3.66936	53645.6
	TG	63.503	29.92	449695			0.48	936866	14.689	53645.6
	CE	65.377	5.94	89237.1			0.48	185911	2.91486	53645.6
	TG	67.237	47.44	713158			0.48	1.48575e+06	23.2948	53645.6
	TG	70.343	3.97	59663.4			0.48	124299	1.94886	53645.6
	TG	70.903	3.23	48492.3			0.48	101026	1.58396	53645.6
WT CRE+					3	8	0.48
	TFC	25.82	2.71	17037.2			0.48	35494.3
	TG	60.387	10.26	64404.6			0.48	134176	3.78022	63780.2
	TG	63.623	23.8	149378			0.48	311205	8.76775	63780.2
	CE	65.523	6.26	39311.6			0.48	81899.2	2.30739	63780.2
	TG	67.367	49.15	308462			0.48	642630	18.1052	63780.2
	TG	70.477	3.32	20815			0.48	43364.6	1.22174	63780.2
	TG	71.033	4.48	28138.8			0.48	58622.5	1.65161	63780.2
WT CRE+					3	8	0.48
	TFC	25.867	3.67	22396.1			0.48	46658.5
	TG	60.257	9.02	54972.4			0.48	114526	2.45455	35494.3
	TG	63.663	26.13	159315			0.48	331906	7.11351	35494.3
	CE	65.567	9.89	60270.7			0.48	125564	2.69113	35494.3
	TG	67.403	44.72	272657			0.48	568036	12.1743	35494.3
	TG	70.513	3.37	20523.2			0.48	42756.7	0.916374	35494.3
	TG	71.073	3.21	19551.7			0.48	40732.7	0.872996	35494.3
WT CRE+					3	7	0.42
	TFC	25.923	1.15	8485.12			0.42	20202.7
	TG	60.483	10.91	80768.7			0.42	192306	9.51887	46658.5
	TG	63.75	26.47	196045			0.42	466773	23.1045	46658.5
	CE	65.667	10.15	75159.8			0.42	178952	8.85784	46658.5
	TG	67.49	44.75	331350			0.42	788929	39.0507	46658.5
	TG	70.593	2.98	22060.6			0.42	52525.3	2.59992	46658.5
	TG	71.167	3.6	26654.3			0.42	63462.7	3.1413	46658.5
										20202.7
										20202.7
										20202.7
										20202.7
										20202.7
										20202.7

## Sheet: EXPT3
GT	peak (in order)	ret time min	rel area %	area counts*min	inj volume	number of larvae in tube	l.e.	area/l.e.	TFC area/i.e.	area/l.e. normalized to TFC peak	total TG measured
	TFC	22.93	100	47338.6	5	8	0.8	59173.2				separate injection
WT CRE-
	TG	59.497	12.77	65692.3	10	8	1.6	41057.7	59173.2	0.693856	3.50894
	CE	60.22	17.77	91399.2	10	8	1.6	57124.5	59173.2	0.965378
	TG	62.733	38.47	197922	10	8	1.6	123701	59173.2	2.0905
	TG	65.813	5.66	29112.1	10	8	1.6	18195.1	59173.2	0.307488
	TG	66.33	7.68	39490.3	10	8	1.6	24681.4	59173.2	0.417105
HET CRE-	TFC	22.933	100	98842.3	5	6	0.6	164737				separate injection
	TG	59.5	13.14	58912.8	7	6	0.84	70134.3	164737	0.425735	1.89444
	CE	60.207	13	58287.4	7	6	0.84	69389.8	164737	0.421215
	TG	62.723	34.53	154816	7	6	0.84	184305	164737	1.11878
	TG	65.797	3.2	14337.1	7	6	0.84	17067.9	164737	0.103607
	TG	66.32	7.6	34085	7	6	0.84	40577.4	164737	0.246316
MUT CRE-	TFC	23.277	5.13	71982.6	25	9	4.5	15996.1				separate injection
	TG	59.507	22.68	21915.1	7	9	1.26	17392.9	15996.1	1.08732	4.02443
	CE	60.21	8.32	8035.73	7	9	1.26	6377.57	15996.1	0.398694
	TG	62.733	45.79	44244.2	7	9	1.26	35114.5	15996.1	2.19518
	TG	65.823	4.57	4413.47	7	9	1.26	3502.75	15996.1	0.218975
	TG	66.33	10.91	10540.2	7	9	1.26	8365.27	15996.1	0.522956
WT CRE+	TFC	23.17	100	48914.6	3	9	0.54	90582.6				separate injection
	TG	59.51	11.67	71999.1	7	9	1.26	57142.2	90582.6	0.630829	2.91692
	CE	60.23	28.91	178436	7	9	1.26	141616	90582.6	1.56339
	TG	62.74	32.79	202397	7	9	1.26	160632	90582.6	1.77332
	TG	65.827	4.03	24874.5	7	9	1.26	19741.7	90582.6	0.217941
	TG	66.34	5.45	33649.8	7	9	1.26	26706.2	90582.6	0.294827
HET CRE+	TFC	23.173	100	52236.2	3	7	0.42	124372				separate injection
	TG	59.513	13.75	68188.8	7	7	0.98	69580.4	124372	0.559454	2.45163
	CE	60.233	18.29	90691.2	7	7	0.98	92542	124372	0.744075
	TG	62.74	35.41	175612	7	7	0.98	179196	124372	1.44081
	TG	65.81	4.11	20367	7	7	0.98	20782.7	124372	0.167101
	TG	66.333	6.99	34647.3	7	7	0.98	35354.4	124372	0.284263

## Sheet: EXPT4
		Ret.Time	Area	injection volume	#larvae/tube	l.e.	area/l.e.	TFC peak area/l.e.	peaks normalized to TFC peak area/l.e.	total TG
GT	Peak (in order)	min	counts*min
WT CRE+	TFC	22.8	26604.5	10	10	2	13302.2	13302.2
	TG	58.37	24064.4	10	10	2	12032.2	13302.2	0.904524	3.25182
	CE	59.533	19150.2	10	10	2	9575.11	13302.2	0.719811
	TG	62.05	52100.7	10	10	2	26050.4	13302.2	1.95834
	TG	65.113	3987.15	10	10	2	1993.57	13302.2	0.149867
	TG	65.667	6360.74	10	10	2	3180.37	13302.2	0.239085
HET CRE+	TFC	22.637	147245	15	10	3	49081.8	49081.8
	TG	58.367	92880.7	15	10	3	30960.2	49081.8	0.630788	2.29165
	CE	59.53	36303.9	15	10	3	12101.3	49081.8	0.246554
	TG	62.04	205811	15	10	3	68603.7	49081.8	1.39774
	TG	65.113	15266.5	15	10	3	5088.84	49081.8	0.103681
	TG	65.687	23476.3	15	10	3	7825.44	49081.8	0.159437
HET CRE-	TFC	22.86	89542.4	10	10	2	44771.2	44771.2
	TG	58.82	30721	10	10	2	15360.5	44771.2	0.343088	1.15838
	CE	59.547	20451.3	10	10	2	10225.6	44771.2	0.228398
	TG	62.02	63377.3	10	10	2	31688.7	44771.2	0.707791
	TG	65.1	3830.6	10	10	2	1915.3	44771.2	0.0427797
	TG	65.66	5795.13	10	10	2	2897.57	44771.2	0.0647194
MUT CRE+	TFC	22.86	36577	3	10	0.6	60961.7	60961.7			separate injection
	TG	58.363	38401.6	10	10	2	19200.8	60961.7	0.314965	1.16411
	CE	59.55	30706.9	10	10	2	15353.4	60961.7	0.251854
	TG	62.013	83576.3	10	10	2	41788.2	60961.7	0.685483
	TG	65.083	8537.97	10	10	2	4268.99	60961.7	0.0700274
	TG	65.637	11415.8	10	10	2	5707.88	60961.7	0.0936306
MUT CRE-	TFC	22.78	43118.6	5	10	1	43118.6	43118.6			separate injection
	TG	58.36	55760.4	10	10	2	27880.2	43118.6	0.646593	2.14756
	CE	59.533	16106.5	10	10	2	8053.27	43118.6	0.18677
	TG	62.02	106354	10	10	2	53177.1	43118.6	1.23328
	TG	65.073	9089.4	10	10	2	4544.7	43118.6	0.1054
	TG	65.647	13995.7	10	10	2	6997.85	43118.6	0.162293
