# Supplementary material for: Genetic therapy in a mitochondrial disease model suggests a critical role for liver dysfunction in mortality
Source: eLife journal article supplement (doi:10.7554/elife.65488), 2022-11-21
Supplement: supp [file elife_poa_e65488_Supplementary_file_1.xls]

## Sheet: Sheet1
GeneTrail2
Statistical analysis of molecular signatures
lrpprc scores_p adjusted value.gsea.zip
Reactome_-_Pathways
Type	Name	Number of hits	Expected score	Adjusted p-value
depleted	Nonsense Mediated Decay (NMD) independent of the Exon Junction Complex (EJC)	62	0	1.51135e-32
depleted	SRP-dependent cotranslational protein targeting to membrane	62	0	1.51135e-32
depleted	Formation of a pool of free 40S subunits	68	0	7.12717e-32
depleted	GTP hydrolysis and joining of the 60S ribosomal subunit	77	0	7.5233e-30
depleted	L13a-mediated translational silencing of Ceruloplasmin expression	77	0	1.417e-28
depleted	Nonsense Mediated Decay (NMD) enhanced by the Exon Junction Complex (EJC)	77	0	1.40097e-24
depleted	Formation of the ternary complex, and subsequently, the 43S complex	38	0	1.66055e-10
depleted	Ribosomal scanning and start codon recognition	44	0	2.56157e-10
depleted	Translation initiation complex formation	44	0	2.85146e-09
enriched	RHO GTPases Activate Formins	71	0	4.97695e-06
enriched	Amplification of signal from unattached kinetochores via a MAD2 inhibitory signal	55	0	9.15191e-06
depleted	Regulation of Complement cascade	14	0	2.08416e-05
enriched	Resolution of Sister Chromatid Cohesion	69	0	0.000717446
enriched	Activation of the pre-replicative complex	22	0	0.000745777
enriched	Assembly of the pre-replicative complex	9	0	0.00184889
enriched	VEGFA-VEGFR2 Pathway	41	0	0.00400145
depleted	Common Pathway of Fibrin Clot Formation	8	0	0.00424319
enriched	TICAM1-dependent activation of IRF3/IRF7	2	0	0.00450344
enriched	TRAF3-dependent IRF activation pathway	2	0	0.00450344
enriched	TRAF6 mediated IRF7 activation	2	0	0.00450344
depleted	G alpha (i) signalling events	93	0	0.00451901
depleted	Scavenging by Class B Receptors	3	0	0.00453843
depleted	Inactivation, recovery and regulation of the phototransduction cascade	18	0	0.00818053
enriched	Transport of Mature mRNA Derived from an Intronless Transcript	18	0	0.00818053
enriched	Transport of the SLBP Dependant Mature mRNA	18	0	0.00818053
enriched	Transport of the SLBP independent Mature mRNA	18	0	0.00818053
depleted	Complex I biogenesis	36	0	0.00989481
enriched	Activation of ATR in response to replication stress	21	0	0.0103558
depleted	Opsins	6	0	0.0110879
depleted	The retinoid cycle in cones (daylight vision)	5	0	0.0169344
enriched	Nuclear Pore Complex (NPC) Disassembly	17	0	0.0180718
enriched	Kinesins	9	0	0.0205903
depleted	Keratinization	15	0	0.0218793
depleted	The canonical retinoid cycle in rods (twilight vision)	11	0	0.0226986
enriched	p130Cas linkage to MAPK signaling for integrins	7	0	0.0335549
depleted	Fructose catabolism	2	0	0.0337419
depleted	Respiratory electron transport	30	0	0.0350185
enriched	Regulation of Glucokinase by Glucokinase Regulatory Protein	16	0	0.037575
enriched	snRNP Assembly	27	0	0.037575
depleted	Interconversion of nucleotide di- and triphosphates	14	0	0.0399179
enriched	CDC6 association with the ORC:origin complex	6	0	0.040828
depleted	Glutathione conjugation	10	0	0.040828
depleted	Intrinsic Pathway of Fibrin Clot Formation	12	0	0.0408631
depleted	Tyrosine catabolism	2	0	0.0471335
KEGG_-_Pathways
Type	Name	Number of hits	Expected score	Adjusted p-value
depleted	Ribosome	122	0	1.07836e-26
depleted	Oxidative phosphorylation	127	0	1.8017e-08
depleted	Neuroactive ligand-receptor interaction	241	0	2.59772e-08
enriched	Focal adhesion	192	0	1.94426e-07
enriched	Aminoacyl-tRNA biosynthesis	32	0	6.27427e-07
enriched	ECM-receptor interaction	66	0	6.27427e-07
enriched	Protein processing in endoplasmic reticulum	153	0	2.78115e-06
depleted	Phototransduction	31	0	4.3015e-06
depleted	Retinol metabolism	34	0	9.90705e-05
enriched	Tight junction	165	0	0.000203599
enriched	MAPK signaling pathway	281	0	0.000243873
enriched	Endocytosis	244	0	0.000250057
depleted	Metabolism of xenobiotics by cytochrome P450	32	0	0.000250057
enriched	NOD-like receptor signaling pathway	114	0	0.000250057
enriched	RIG-I-like receptor signaling pathway	49	0	0.000400643
enriched	Salmonella infection	69	0	0.000400643
enriched	Herpes simplex virus 1 infection	136	0	0.000481788
enriched	DNA replication	32	0	0.000613976
depleted	Drug metabolism - other enzymes	52	0	0.000613976
enriched	Toll-like receptor signaling pathway	72	0	0.000613976
enriched	Homologous recombination	31	0	0.000742882
enriched	Adherens junction	78	0	0.000814673
depleted	Cardiac muscle contraction	97	0	0.00141615
enriched	Mismatch repair	18	0	0.00179242
enriched	Cell cycle	118	0	0.00257639
enriched	Regulation of actin cytoskeleton	196	0	0.00438866
enriched	AGE-RAGE signaling pathway in diabetic complications	104	0	0.00608347
enriched	Ribosome biogenesis in eukaryotes	64	0	0.00614491
enriched	Selenocompound metabolism	11	0	0.00831795
enriched	Apoptosis	131	0	0.00878295
enriched	Insulin signaling pathway	145	0	0.00962867
depleted	Drug metabolism - cytochrome P450	27	0	0.00981363
enriched	p53 signaling pathway	66	0	0.0106137
enriched	Cellular senescence	150	0	0.0113017
enriched	Cytosolic DNA-sensing pathway	33	0	0.0117708
enriched	ErbB signaling pathway	90	0	0.0117708
enriched	C-type lectin receptor signaling pathway	93	0	0.0143171
depleted	Tryptophan metabolism	41	0	0.0176525
depleted	Peroxisome	75	0	0.0196397
depleted	PPAR signaling pathway	55	0	0.0201821
enriched	mRNA surveillance pathway	75	0	0.0243733
enriched	Sphingolipid metabolism	49	0	0.0257624
depleted	Biosynthesis of unsaturated fatty acids	25	0	0.0275751
enriched	One carbon pool by folate	16	0	0.0335018
enriched	Terpenoid backbone biosynthesis	19	0	0.0341531
depleted	Glycerolipid metabolism	48	0	0.0350623
enriched	Cysteine and methionine metabolism	48	0	0.0377512
enriched	Proteasome	46	0	0.0423987
depleted	beta-Alanine metabolism	31	0	0.0423987
GO_-_Cellular_Component
Type	Name	Number of hits	Expected score	Adjusted p-value
depleted	cytosolic large ribosomal subunit	41	0	3.11171e-25
depleted	ribosome	150	0	2.55263e-17
depleted	cytosolic small ribosomal subunit	35	0	4.59623e-16
depleted	large ribosomal subunit	78	0	2.25419e-08
enriched	nuclear pore	36	0	4.52258e-07
depleted	cation channel complex	141	0	3.56148e-06
depleted	small ribosomal subunit	56	0	6.31162e-06
depleted	transmembrane transporter complex	185	0	2.42964e-05
enriched	membrane coat	47	0	3.31903e-05
depleted	ion channel complex	176	0	4.47979e-05
depleted	ionotropic glutamate receptor complex	36	0	5.38515e-05
depleted	respirasome	29	0	0.000108711
depleted	intermediate filament	55	0	0.000141447
depleted	postsynaptic density membrane	42	0	0.000158638
depleted	synapse	212	0	0.000304383
depleted	AMPA glutamate receptor complex	21	0	0.000497856
depleted	extracellular space	579	0	0.000549726
depleted	troponin complex	22	0	0.000578972
enriched	chromosome, centromeric region	34	0	0.000827756
depleted	haptoglobin-hemoglobin complex	6	0	0.00114305
depleted	extracellular region	479	0	0.00119213
enriched	endoplasmic reticulum chaperone complex	2	0	0.00150517
enriched	integrin complex	30	0	0.0016474
depleted	neuron projection	335	0	0.00180792
depleted	photoreceptor outer segment	31	0	0.00182882
enriched	endoplasmic reticulum	536	0	0.00213497
enriched	Golgi apparatus	426	0	0.00351446
depleted	hemoglobin complex	8	0	0.00388903
enriched	adherens junction	134	0	0.006953
enriched	chromosome	120	0	0.00810935
enriched	condensin complex	5	0	0.00810935
depleted	keratin filament	6	0	0.00810935
enriched	nucleoplasm	148	0	0.010849
enriched	phenylalanine-tRNA ligase complex	2	0	0.010849
enriched	nuclear condensin complex	3	0	0.0116517
depleted	NADH dehydrogenase complex	33	0	0.015829
depleted	mitochondrial respiratory chain complex I	33	0	0.015829
depleted	postsynaptic membrane	100	0	0.0158973
enriched	MCM complex	8	0	0.0210985
enriched	kinetochore	46	0	0.0210985
depleted	respiratory chain complex IV	17	0	0.0210985
enriched	nuclear replication fork	7	0	0.0223284
depleted	9+2 motile cilium	6	0	0.0244283
enriched	cyclin-dependent protein kinase holoenzyme complex	25	0	0.0275822
depleted	ciliary membrane	12	0	0.0288586
enriched	mitochondrial fatty acid beta-oxidation multienzyme complex	2	0	0.0405632
enriched	condensed chromosome, centromeric region	4	0	0.0420719
GO_-_Biological_Process
Type	Name	Number of hits	Expected score	Adjusted p-value
depleted	visual perception	120	0	1.84756e-24
depleted	sensory perception of light stimulus	126	0	6.52363e-22
depleted	sensory perception	189	0	3.3205e-17
depleted	nervous system process	275	0	6.87175e-15
enriched	protein phosphorylation	580	0	6.87175e-15
depleted	lens development in camera-type eye	66	0	4.3808e-14
depleted	modulation of chemical synaptic transmission	124	0	1.07418e-08
depleted	translation	242	0	1.22686e-07
depleted	synaptic signaling	167	0	1.81331e-07
enriched	tRNA aminoacylation for protein translation	35	0	3.02661e-07
depleted	G protein-coupled receptor signaling pathway	466	0	3.74417e-07
depleted	chemical synaptic transmission	163	0	4.39266e-07
depleted	peptide metabolic process	314	0	4.39266e-07
depleted	cell-cell signaling	189	0	4.43118e-07
enriched	chromosome organization	153	0	5.1976e-07
enriched	RNA processing	503	0	9.66772e-07
enriched	DNA replication	86	0	1.67612e-06
enriched	DNA replication initiation	18	0	1.96458e-06
enriched	DNA metabolic process	347	0	2.17845e-06
enriched	tRNA aminoacylation	39	0	2.93828e-06
enriched	locomotion	508	0	3.67592e-06
depleted	signaling	213	0	2.1326e-05
depleted	amide biosynthetic process	312	0	2.71654e-05
enriched	tRNA metabolic process	137	0	3.46307e-05
enriched	cytoskeleton organization	568	0	3.54172e-05
enriched	cell motility	465	0	4.8318e-05
depleted	oxidation-reduction process	649	0	5.32294e-05
enriched	protein import	77	0	5.32294e-05
enriched	cell migration	446	0	5.86807e-05
enriched	mitotic cell cycle checkpoint	47	0	8.27115e-05
enriched	establishment of protein localization	697	0	0.000161057
depleted	regulated exocytosis	50	0	0.000162659
enriched	cellular response to DNA damage stimulus	333	0	0.000193223
enriched	protein import into nucleus	48	0	0.000193223
enriched	regulation of mitotic cell cycle phase transition	67	0	0.000230456
enriched	methylation	164	0	0.000241343
depleted	cell communication	282	0	0.000241557
depleted	synaptic vesicle exocytosis	27	0	0.000265688
enriched	peptide transport	694	0	0.000277716
enriched	import into nucleus	49	0	0.000305577
depleted	phototransduction	32	0	0.000319225
enriched	anatomical structure formation involved in morphogenesis	572	0	0.000344108
enriched	protein transport	686	0	0.00035258
enriched	cell cycle	237	0	0.000371618
depleted	xenobiotic metabolic process	47	0	0.000413464
enriched	protein localization to nucleus	50	0	0.000479338
depleted	cytoplasmic translation	23	0	0.000602906
enriched	actin cytoskeleton organization	295	0	0.000942851
enriched	animal organ morphogenesis	317	0	0.000942851
depleted	calcium-ion regulated exocytosis	34	0	0.00117241
enriched	chromosome segregation	57	0	0.00132441
enriched	cellular amino acid metabolic process	194	0	0.00163308
depleted	regulation of ion transport	220	0	0.00169355
depleted	detection of light stimulus	40	0	0.00187985
enriched	positive regulation of catalytic activity	286	0	0.00187985
enriched	regulation of cell cycle phase transition	76	0	0.00191961
depleted	cellular aldehyde metabolic process	32	0	0.00200408
depleted	cellular detoxification of aldehyde	7	0	0.00242844
depleted	hydrogen peroxide catabolic process	13	0	0.00242844
enriched	intracellular protein transport	509	0	0.00242844
enriched	nuclear transport	93	0	0.00242844
enriched	nucleocytoplasmic transport	93	0	0.00242844
depleted	protein-chromophore linkage	26	0	0.00242844
depleted	regulation of dopamine secretion	26	0	0.00242844
depleted	synaptic transmission, glutamatergic	38	0	0.00242844
enriched	ncRNA processing	248	0	0.00256409
enriched	establishment of protein localization to organelle	149	0	0.00365219
depleted	regulation of synaptic transmission, glutamatergic	25	0	0.00371435
enriched	double-strand break repair via break-induced replication	11	0	0.0037538
enriched	supramolecular fiber organization	304	0	0.0037538
depleted	exogenous drug catabolic process	35	0	0.0041091
enriched	morphogenesis of an epithelium	345	0	0.00417424
enriched	chromosome separation	5	0	0.00446909
enriched	mitotic DNA integrity checkpoint	21	0	0.00450335
depleted	pyrimidine nucleobase catabolic process	3	0	0.00500937
enriched	double-strand break repair via homologous recombination	56	0	0.00588001
enriched	recombinational repair	56	0	0.00588001
depleted	regulation of synaptic plasticity	37	0	0.00634016
enriched	actin filament organization	197	0	0.00694727
enriched	DNA repair	247	0	0.00717094
enriched	regulation of cell cycle process	149	0	0.00741092
depleted	monovalent inorganic cation transport	222	0	0.00838743
enriched	spindle organization	63	0	0.00838743
enriched	protein folding	111	0	0.00961556
depleted	calcium ion-regulated exocytosis of neurotransmitter	14	0	0.0105955
depleted	regulation of long-term synaptic potentiation	4	0	0.0105955
depleted	regulation of presynaptic cytosolic calcium ion concentration	4	0	0.0105955
enriched	response to bacterium	76	0	0.0105955
enriched	phospholipid biosynthetic process	81	0	0.0116218
enriched	anatomical structure homeostasis	87	0	0.0116892
enriched	negative regulation of G2/M transition of mitotic cell cycle	13	0	0.0137485
enriched	extracellular matrix organization	129	0	0.0156423
enriched	regulation of G2/M transition of mitotic cell cycle	20	0	0.0157239
depleted	response to calcium ion	40	0	0.0157826
depleted	respiratory electron transport chain	47	0	0.0169859
depleted	detoxification	20	0	0.0180451
enriched	muscle attachment	10	0	0.0181299
enriched	regulation of mitotic cell cycle	143	0	0.0184424
depleted	response to nutrient levels	75	0	0.0184826
depleted	multicellular organism development	632	0	0.0190265
depleted	cellular response to calcium ion	34	0	0.0190653
depleted	L-phenylalanine catabolic process	8	0	0.0195908
depleted	oxygen transport	12	0	0.0195908
enriched	cell adhesion	397	0	0.020492
enriched	double-strand break repair	95	0	0.0208537
depleted	organic acid metabolic process	485	0	0.0213773
depleted	cellular amide catabolic process	4	0	0.0214324
enriched	ameboidal-type cell migration	197	0	0.0214607
enriched	signal transduction by protein phosphorylation	67	0	0.0216954
enriched	ribosome biogenesis	51	0	0.0223004
depleted	electron transport chain	51	0	0.0251336
enriched	leucyl-tRNA aminoacylation	2	0	0.0251336
enriched	DNA damage checkpoint	27	0	0.0253174
enriched	peptidyl-arginine methylation	4	0	0.0259647
enriched	pre-replicative complex assembly involved in nuclear cell cycle DNA replication	7	0	0.0259647
enriched	regulation of small GTPase mediated signal transduction	162	0	0.0259647
depleted	cone photoresponse recovery	6	0	0.0260701
enriched	mitotic spindle assembly checkpoint	15	0	0.0260701
enriched	negative regulation of cell division	5	0	0.0260701
enriched	DNA recombination	99	0	0.0263758
depleted	beta-alanine biosynthetic process	2	0	0.0263758
depleted	beta-alanine metabolic process	2	0	0.0263758
enriched	chromatin organization	301	0	0.0263758
enriched	protein localization to organelle	212	0	0.0263758
depleted	skeletal muscle contraction	30	0	0.0263758
enriched	transmembrane receptor protein tyrosine kinase signaling pathway	204	0	0.0263758
enriched	mRNA processing	220	0	0.0264646
enriched	regulation of Ras protein signal transduction	145	0	0.0264646
enriched	telomere maintenance	39	0	0.0264646
enriched	regulation of intracellular signal transduction	513	0	0.0273082
depleted	regulation of ion transmembrane transport	181	0	0.0273082
enriched	cell division	125	0	0.0295691
enriched	DNA unwinding involved in DNA replication	10	0	0.0296156
enriched	regulation of cytoskeleton organization	240	0	0.0296156
enriched	mitotic G2 DNA damage checkpoint	5	0	0.0299329
depleted	aromatic amino acid family metabolic process	27	0	0.0303239
enriched	endoplasmic reticulum to Golgi vesicle-mediated transport	80	0	0.0305873
enriched	positive regulation of kinase activity	118	0	0.031657
enriched	nucleus organization	13	0	0.0321437
enriched	COPII-coated vesicle budding	5	0	0.0353373
depleted	cardiac muscle contraction	27	0	0.0353373
enriched	cellular response to unfolded protein	9	0	0.0360357
depleted	cellular response to light stimulus	44	0	0.0362548
depleted	tyrosine catabolic process	3	0	0.0362548
depleted	formaldehyde catabolic process	5	0	0.0364653
depleted	formaldehyde metabolic process	5	0	0.0364653
enriched	mitotic DNA damage checkpoint	15	0	0.036862
enriched	nucleotide-sugar biosynthetic process	15	0	0.0390374
enriched	positive regulation of protein kinase activity	117	0	0.0390374
depleted	response to nutrient	19	0	0.0407297
depleted	G protein-coupled glutamate receptor signaling pathway	17	0	0.0417584
enriched	transmembrane receptor protein serine/threonine kinase signaling pathway	73	0	0.0439532
depleted	retinal metabolic process	8	0	0.045022
enriched	carboxylic acid metabolic process	430	0	0.0464322
enriched	L-serine biosynthetic process	3	0	0.0496301
GO_-_Molecular_Function
Type	Name	Number of hits	Expected score	Adjusted p-value
depleted	structural constituent of eye lens	47	0	2.78404e-27
depleted	structural constituent of ribosome	144	0	5.93154e-18
enriched	protein kinase activity	599	0	6.99787e-17
depleted	structural molecule activity	427	0	6.99787e-17
enriched	ATPase activity	282	0	8.68115e-12
enriched	protein serine/threonine kinase activity	414	0	1.50001e-09
enriched	ATPase activity, coupled	167	0	1.67667e-08
depleted	oxidoreductase activity	679	0	5.3225e-08
enriched	ligase activity	123	0	1.55165e-07
enriched	pyrophosphatase activity	689	0	1.55165e-07
enriched	aminoacyl-tRNA ligase activity	37	0	1.6779e-07
enriched	hydrolase activity, acting on acid anhydrides	694	0	1.6779e-07
enriched	hydrolase activity, acting on acid anhydrides, in phosphorus-containing anhydrides	691	0	1.6779e-07
depleted	glutamate receptor activity	41	0	6.21833e-07
depleted	ion channel activity	378	0	1.51748e-06
depleted	neurotransmitter receptor activity	99	0	1.77834e-06
depleted	channel activity	405	0	2.72827e-06
enriched	structural constituent of nuclear pore	19	0	5.80982e-06
depleted	heme binding	126	0	1.16547e-05
enriched	DNA-dependent ATPase activity	52	0	1.34876e-05
enriched	helicase activity	85	0	1.34876e-05
enriched	DNA replication origin binding	18	0	1.84915e-05
depleted	extracellular ligand-gated ion channel activity	83	0	2.53549e-05
depleted	photoreceptor activity	33	0	7.02564e-05
depleted	cation channel activity	302	0	9.15358e-05
enriched	GTPase binding	339	0	0.000109998
enriched	small GTPase binding	273	0	0.000161575
depleted	iron ion binding	145	0	0.000194641
depleted	G protein-coupled photoreceptor activity	30	0	0.000200653
depleted	oxidoreductase activity, acting on paired donors, with incorporation or reduction of molecular oxygen, reduced flavin or flavoprotein as one donor, and incorporation of one atom of oxygen	41	0	0.000234931
enriched	Ras GTPase binding	269	0	0.000240465
depleted	cytochrome-c oxidase activity	21	0	0.000292484
depleted	heme-copper terminal oxidase activity	21	0	0.000292484
enriched	enzyme binding	671	0	0.000397174
depleted	ionotropic glutamate receptor activity	29	0	0.000410201
depleted	monooxygenase activity	113	0	0.000410201
enriched	tRNA binding	30	0	0.000419132
depleted	G protein-coupled receptor activity	323	0	0.000464081
enriched	CARD domain binding	6	0	0.00121013
enriched	enzyme activator activity	277	0	0.00148117
depleted	alcohol dehydrogenase (NAD+) activity	5	0	0.00161886
depleted	voltage-gated ion channel activity	176	0	0.00161886
depleted	enzyme inhibitor activity	177	0	0.001669
depleted	dipeptide transmembrane transporter activity	3	0	0.00206518
enriched	protein tyrosine kinase activity	113	0	0.00210719
depleted	inorganic cation transmembrane transporter activity	532	0	0.00214213
enriched	N-methyltransferase activity	64	0	0.00219857
depleted	tryptophan 2,3-dioxygenase activity	3	0	0.00219857
depleted	steroid hydroxylase activity	48	0	0.00222191
depleted	voltage-gated channel activity	180	0	0.0025513
enriched	DNA helicase activity	29	0	0.00353815
depleted	cation transmembrane transporter activity	568	0	0.0048972
depleted	transmitter-gated ion channel activity	61	0	0.0048972
depleted	ligand-gated ion channel activity	141	0	0.00544901
enriched	GTPase regulator activity	193	0	0.00774472
depleted	S-(hydroxymethyl)glutathione dehydrogenase activity	4	0	0.00774472
depleted	alcohol dehydrogenase activity, zinc-dependent	4	0	0.00774472
enriched	nucleotide-sugar transmembrane transporter activity	15	0	0.00774472
depleted	serine-type peptidase activity	128	0	0.00774472
enriched	RNA polymerase II-specific DNA-binding transcription factor binding	70	0	0.00886879
enriched	Rho GTPase binding	135	0	0.00886879
enriched	GTPase activator activity	182	0	0.00921163
depleted	oxygen binding	12	0	0.0124285
depleted	oxygen carrier activity	12	0	0.0124285
enriched	metalloendopeptidase activity	92	0	0.0146238
enriched	transmembrane receptor protein tyrosine kinase activity	70	0	0.0151301
depleted	calcium-dependent phospholipid binding	57	0	0.0153821
enriched	heat shock protein binding	37	0	0.0153821
enriched	leucine-tRNA ligase activity	2	0	0.0160817
depleted	serine-type endopeptidase activity	110	0	0.0162046
enriched	methyltransferase activity	179	0	0.0166572
enriched	nuclear localization sequence binding	16	0	0.0166572
enriched	superoxide-generating NADPH oxidase activator activity	8	0	0.0166572
enriched	Ran GTPase binding	20	0	0.0175386
depleted	potassium channel activity	118	0	0.0175386
enriched	aminoacyl-tRNA editing activity	12	0	0.0201048
depleted	phosphatidylserine binding	27	0	0.020194
depleted	calcium sensitive guanylate cyclase activator activity	6	0	0.0202158
depleted	guanylate cyclase activator activity	6	0	0.0202158
enriched	organic anion transmembrane transporter activity	163	0	0.0202158
depleted	peptidase inhibitor activity	103	0	0.0202158
depleted	hormone activity	77	0	0.0228075
enriched	ethanolaminephosphotransferase activity	3	0	0.0237672
depleted	G protein-coupled amine receptor activity	42	0	0.024088
depleted	transmitter-gated ion channel activity involved in regulation of postsynaptic membrane potential	54	0	0.024088
enriched	unfolded protein binding	81	0	0.0272023
enriched	transcription factor binding	240	0	0.0272034
enriched	extracellular matrix structural constituent	72	0	0.0275804
enriched	histone methyltransferase activity	41	0	0.0275804
depleted	endopeptidase inhibitor activity	95	0	0.0303688
enriched	L-amino acid transmembrane transporter activity	38	0	0.0307888
depleted	selenium binding	3	0	0.0307888
depleted	oxidoreductase activity, acting on paired donors, with incorporation or reduction of molecular oxygen	158	0	0.0371614
enriched	S-adenosylmethionine-dependent methyltransferase activity	117	0	0.0372045
enriched	chaperone binding	27	0	0.0372045
enriched	amino acid transmembrane transporter activity	69	0	0.0374681
depleted	electron transfer activity	55	0	0.0379196
depleted	retinoid binding	15	0	0.0403774
enriched	endopeptidase activity	326	0	0.0427921
enriched	anion transmembrane transporter activity	254	0	0.0444797
enriched	long-chain-3-hydroxyacyl-CoA dehydrogenase activity	2	0	0.0444797
enriched	signal sequence binding	29	0	0.0448466
depleted	cofactor binding	427	0	0.0466427
depleted	monocarboxylic acid binding	26	0	0.0490022
WikiPathways
Type	Name	Number of hits	Expected score	Adjusted p-value
depleted	Cytoplasmic Ribosomal Proteins	75	0	0
enriched	Cell cycle	78	0	3.80642e-08
enriched	Insulin Signaling	130	0	9.28735e-07
enriched	DNA Replication	34	0	1.36604e-06
depleted	Electron Transport Chain	85	0	1.36604e-06
depleted	Oxidative phosphorylation	49	0	1.29765e-05
enriched	G1 to S cell cycle control	50	0	5.63574e-05
enriched	FAS pathway and Stress induction of HSP regulation	33	0	5.67618e-05
enriched	TNF-alpha NF-kB Signaling Pathway	134	0	0.000203264
enriched	mRNA processing	117	0	0.000510417
enriched	Wnt Signaling Pathway and Pluripotency	64	0	0.00222502
enriched	EGFR1 Signaling Pathway	130	0	0.00358619
enriched	Alpha6-Beta4 Integrin Signaling Pathway	43	0	0.00896026
enriched	Cholesterol Biosynthesis	15	0	0.00896026
enriched	MAPK Signaling Pathway	183	0	0.00896026
enriched	Toll-like receptor signaling pathway	59	0	0.00896026
enriched	Integrin-mediated cell adhesion	67	0	0.0151861
depleted	PPAR Signaling Pathway	48	0	0.0256516
enriched	Signaling of Hepatocyte Growth Factor Receptor	29	0	0.0259711
depleted	Nuclear receptors in lipid metabolism and toxicity	15	0	0.0261698
depleted	Calcium Regulation in the Cardiac Cell	103	0	0.0492829
